# Supplementary material
Source: publisher site journal article supplement (https://www.dovepress.com/article/83047)
Supplement: Supplementary file 1 [file get_supplementary_file.php]

## Supplementary Material

| <b>Table of Contents</b>                                                         | <b>Pages</b> |
|----------------------------------------------------------------------------------|--------------|
| Evaluation of the test compounds using Lipinski's rule                           | 2            |
| Characterization of compounds PB3, PB6, PB10, PB11, PB12, PB14, PB15, PB17, PB19 | 2-6          |
| Docking Methodology                                                              | 6-8          |
| Cytotoxicity Assay                                                               | 8-9          |
| References                                                                       | 9            |
| Spectras                                                                         | 10-15        |

## Evaluation of the Test Compounds Using Lipinski's Rule

Drug likeliness of the compounds is evaluated based on Lipinski's rule. This rule describes the important pharmacokinetic parameters (ADME) on the basis of molecular properties of the drug.

Lipinski explained the following basic criteria in his rule.

- Hydrogen bond donors should not be more than 5 (like OH & NH)
- Hydrogen bond acceptors should not be more than 10 (electronegative atoms like O & N)
- The molecular weight should be less than 500 daltons
- The partition coefficient (logP) should not be greater than 5

## Characterization of Compounds

2-[(4-hydrazinylidenepiperidin-1-yl)methyl]-1H-benzimidazole (**PB3**)

<sup>1</sup>H-NMR (DMSO-d<sub>6</sub>) δ: 1.43 (t, 4H, J=6.8Hz, H<sub>3</sub>&H<sub>5</sub> piperidine), 2.45 (t, 4H, J=6.8Hz, H<sub>2</sub>&H<sub>6</sub> piperidine), 3.57 (s, 2H, -N-CH<sub>2</sub>), 5.95 (s, 2H, =N-NH<sub>2</sub>); 7.23 (d, 2H, J=8.4 Hz, H<sub>5</sub>&H<sub>6</sub> benzimidazole), 7.59 (d, 2H, J=8.4 Hz, H<sub>4</sub>&H<sub>7</sub> benzimidazole), 12.19 (s, 1H, NH benzimidazole). <sup>13</sup>C-NMR (DMSO-d<sub>6</sub>) δ: 23.51, 53.71 (4C, piperidine), 55.54 (CH<sub>2</sub>), 114.96, 122.93, 138.75 (6C, Ar), 141.71 (imidazole), 161.58 (C=N). IR (KBr) cm<sup>-1</sup>: 3314, 3247 (NH<sub>2</sub>, NH), 3057, 2975, 2884 (CH), 1585 (C=N). MS m/z: 243 (M)<sup>+</sup>. Anal. calcd for C<sub>13</sub>H<sub>17</sub>N<sub>5</sub>: C, 64.17; H, 7.04; N, 28.78. Found: C, 63.87, H, 6.65; N, 29.11. N-[1-(1H-benzimidazol-2-ylmethyl)piperidin-4-ylidene]-4-fluoroaniline (**PB6**)

$^1\text{H-NMR}$  (DMSO- $d_6$ )  $\delta$ : 1.45 (t, 4H,  $J=6.8$  Hz,  $\text{H}_3\&\text{H}_5$  piperidine), 2.40 (t, 4H,  $J=6.8$  Hz,  $\text{H}_2\&\text{H}_6$  piperidine), 3.60 (s, 2H,  $-\text{N-CH}_2$ ), 7.01-7.60 (m, 8H, Ar-H), 12.15 (s, 1H, NH benzimidazole).  $^{13}\text{C-NMR}$  (DMSO- $d_6$ )  $\delta$ : 25.25, 53.07 (4C, piperidine), 55.37 ( $\text{CH}_2$ ), 115.55, 123.07, 138.33, (6C, Ar), 116.90 (d, 2C,  $J=23.3\text{Hz}$ , C3&C5 fluorenyl), 130.01 (d, 2C,  $J=8.5\text{Hz}$ , C2&C6 fluorenyl), 144.57 (1C, C1 fluorenyl), 161.45 (d, 1C,  $J=250.7\text{Hz}$ , C4 fluorenyl), 141.56 (imidazole), 187.79 (C=N). IR (KBr)  $\text{cm}^{-1}$ : 3253 (NH), 3059, 2974, 2884 (CH), 1639 (C=N). MS  $m/z$ : 322 ( $\text{M}^+$ ). Anal. calcd for  $\text{C}_{19}\text{H}_{19}\text{FN}_4$ : C, 70.79; H, 5.94; N, 17.38. Found: C, 71.04, H, 5.63; N, 17.69.

N-[1-(1H-benzimidazol-2-ylmethyl)piperidin-4-ylidene]-3-chloro-2-methylaniline  
**(PB10)**

$^1\text{H-NMR}$  (DMSO- $d_6$ )  $\delta$ : 1.46 (t, 4H,  $J=6.8$  Hz,  $\text{H}_3\&\text{H}_5$  piperidine), 2.37 (s, 3H,  $\text{CH}_3$ ); 2.43 (t, 4H,  $J=6.8$  Hz,  $\text{H}_2\&\text{H}_6$  piperidine), 3.65 (s, 2H,  $-\text{N-CH}_2$ ), 6.96-7.51 (m, 7H, Ar-H), 12.20 (s, 1H, NH benzimidazole).  $^{13}\text{C-NMR}$  (DMSO- $d_6$ )  $\delta$ : 24.47, 53.34 (4C, piperidine), 55.34 ( $\text{CH}_2$ ), 115.54, 120.36, 123.05, 126.47, 127.24, 128.32, 135.65, 139.11, 148.37 (12C, Ar), 141.58 (imidazole), 188.06 (C=N). IR (KBr)  $\text{cm}^{-1}$ : 3233 (NH), 3036, 2914, (CH), 1617 (C=N). MS  $m/z$ : 352 ( $\text{M}^+$ ). Anal. calcd for  $\text{C}_{20}\text{H}_{21}\text{ClN}_4$ : C, 68.08; H, 6.00; N, 15.88. Found: C, 67.92, H, 5.60; N, 16.25.

N-[1-(1H-benzimidazol-2-ylmethyl)piperidin-4-ylidene]-2,4-dichloroaniline **(PB11)**

<sup>1</sup>H-NMR (DMSO-d<sub>6</sub>) δ: 1.44 (t, 4H, J=6.8 Hz, H<sub>3</sub>&H<sub>5</sub> piperidine), 2.41 (t, 4H, J=6.8 Hz, H<sub>2</sub>&H<sub>6</sub> piperidine), 3.62 (s, 2H, -N-CH<sub>2</sub>), 6.76-7.47 (m, 7H, Ar-H), 12.18 (s, 1H, NH benzimidazole). <sup>13</sup>C-NMR (DMSO-d<sub>6</sub>) δ: 24.51, 53.59 (4C, piperidine), 55.34 (CH<sub>2</sub>), 115.04, 123.07, 125.32, 128.04, 129.56, 131.84, 134.11, 137.58, 139.35 (12C, Ar), 141.77 (imidazole), 187.82 (C=N). IR (KBr) cm<sup>-1</sup>: 3227 (NH), 3073, 2954, 2893 (CH), 1604 (C=N). MS m/z: 373 (M)<sup>+</sup>. Anal. calcd. for C<sub>19</sub>H<sub>18</sub>Cl<sub>2</sub>N<sub>4</sub>: C, 61.13; H, 4.86; N, 15.01. Found: C, 60.80, H, 4.51; N, 14.70.

N-[1-(1H-benzimidazol-2-ylmethyl)piperidin-4-ylidene]-2,4-difluoroaniline (**PB12**)

<sup>1</sup>H-NMR (DMSO-d<sub>6</sub>) δ: 1.40 (t, 4H, J=6.8 Hz, H<sub>3</sub>&H<sub>5</sub> piperidine), 2.39 (t, 4H, J=6.8 Hz, H<sub>2</sub>&H<sub>6</sub> piperidine), 3.66 (s, 2H, -N-CH<sub>2</sub>), 6.72-7.52 (m, 7H, Ar-H), 12.17 (s, 1H, NH benzimidazole). <sup>13</sup>C-NMR (DMSO-d<sub>6</sub>) δ: 25.64, 53.18 (4C, piperidine), 55.47 (CH<sub>2</sub>), 115.39, 123.15, 139.02, (6C, Ar), 106.06 (t, 1C, J=50.9 Hz, C3 difluorophenyl), 112.54 (dd, 1C, J=27.5, 5.4 Hz, C5 difluorophenyl), 125.77 (dd, 1C, J=13.1, 3.9 Hz, C6 difluorophenyl), 131.51 (dd, 1C, J=9.4, 4.5 Hz, C1 difluorophenyl), 155.24 (dd, 1C, J=267.6, 14.6 Hz, C2 difluorophenyl), 163.06 (dd, 1C, J=259.9, 14.6 Hz, C4 difluorophenyl), 141.43 (imidazole), 187.96 (C=N). IR (KBr) cm<sup>-1</sup> 3238 (NH), 3027, 2966, 2894 (CH), 1628 (C=N). MS m/z: 340 (M)<sup>+</sup>. Anal. calcd for C<sub>19</sub>H<sub>18</sub>F<sub>2</sub>N<sub>4</sub>: C, 67.05; H, 5.33; N, 16.46. Found: C, 66.77, H, 5.54; N, 16.11.

N-[1-(1H-benzimidazol-2-ylmethyl)piperidin-4-ylidene]aniline (**PB14**)

<sup>1</sup>H-NMR (DMSO-d<sub>6</sub>) δ: 1.44 (t, 4H, J=6.8 Hz, H<sub>3</sub>&H<sub>5</sub> piperidine), 2.44 (t, 4H, J=6.8 Hz, H<sub>2</sub>&H<sub>6</sub> piperidine), 3.65 (s, 2H, -N-CH<sub>2</sub>), 7.07-7.52 (m, 9H, Ar-H), 12.21 (s, 1H, NH benzimidazole). <sup>13</sup>C-NMR (DMSO-d<sub>6</sub>) δ: 24.96, 53.68 (4C, piperidine), 55.54

(CH<sub>2</sub>), 115.34, 122.47, 123.11, 127.49, 130.21, 138.75, 149.17 (12C, Ar), 141.27 (imidazole), 188.20 (C=N). IR (KBr) cm<sup>-1</sup>: 3219 (NH), 3044, 2980, 2881 (CH), 1587 (C=N). MS m/z: 304 (M)<sup>+</sup>. Anal. calcd for C<sub>19</sub>H<sub>20</sub>N<sub>4</sub>: C, 74.97; H, 6.62; N, 18.41. Found: C, 74.71, H, 6.36; N, 18.20. N-[1-(1H-benzimidazol-2-ylmethyl)piperidin-4-ylidene]-4-chloroaniline (**PB15**)

<sup>1</sup>H-NMR (DMSO-d<sub>6</sub>) δ: 1.38 (t, 4H, J=6.8 Hz, H<sub>3</sub>&H<sub>5</sub> piperidine), 2.39 (t, 4H, J=6.8 Hz, H<sub>2</sub>&H<sub>6</sub> piperidine), 3.60 (s, 2H, -N-CH<sub>2</sub>), 7.22-7.56 (m, 8H, Ar-H), 12.16 (s, 1H, NH benzimidazole). <sup>13</sup>C-NMR (DMSO-d<sub>6</sub>) δ: 24.36, 53.04 (4C, piperidine), 55.13 (CH<sub>2</sub>), 115.37, 123.07, 123.91, 130.24, 132.89, 138.86, 147.37 (12C, Ar), 141.26 (imidazole), 187.79 (C=N). IR (KBr) cm<sup>-1</sup>: 3243 (NH), 3064, 2914, 2884 (CH), 1621 (C=N). MS m/z: 338 (M)<sup>+</sup>. Anal. calcd for C<sub>19</sub>H<sub>19</sub>ClN<sub>4</sub>: C, 67.35; H, 5.65; N, 16.54. Found: C, 67.73, H, 5.94; N, 16.24.

N-[1-(1H-benzimidazol-2-ylmethyl)piperidin-4-ylidene]-2,4-dinitroaniline (**PB17**)

<sup>1</sup>H-NMR (DMSO-d<sub>6</sub>) δ: 1.47 (t, 4H, J=6.8 Hz, H<sub>3</sub>&H<sub>5</sub> piperidine), 2.45 (t, 4H, J=6.8 Hz, H<sub>2</sub>&H<sub>6</sub> piperidine), 3.63 (s, 2H, -N-CH<sub>2</sub>), 7.26-8.67 (m, 7H, Ar-H), 12.14 (s, 1H, NH benzimidazole). <sup>13</sup>C-NMR (DMSO-d<sub>6</sub>) δ: 25.07, 53.60 (4C, piperidine), 55.44 (CH<sub>2</sub>), 115.35, 121.47, 123.17, 124.19, 131.66, 139.04, 144.18, 147.43, 148.40 (12C, Ar), 141.64 (imidazole), 187.96 (C=N). IR (KBr) cm<sup>-1</sup>: 3249 (NH), 3029, 2964, 2875 (CH), 1590 (C=N). MS m/z 394 [M]<sup>+</sup>. Anal. calcd for C<sub>19</sub>H<sub>18</sub>N<sub>6</sub>O<sub>4</sub>: C, 57.86; H, 4.60; N, 21.31. Found: C, 58.17, H, 4.84; N, 20.97.

1-(1H-benzimidazol-2-ylmethyl)-N-methoxypiperidin-4-imine (**PB19**)

<sup>1</sup>H-NMR (DMSO-d<sub>6</sub>) δ: 1.40 (t, 4H, J=6.8 Hz, H<sub>3</sub>&H<sub>5</sub> piperidine), 2.44 (t, 4H, J=6.8 Hz, H<sub>2</sub>&H<sub>6</sub> piperidine), 3.58 (s, 2H, -N-CH<sub>2</sub>), 4.04 (s, 3H, OCH<sub>3</sub>), 7.20 (d, 2H, H<sub>5</sub>&H<sub>6</sub> benzimidazole), 7.44 (d, 2H, H<sub>4</sub>&H<sub>7</sub> benzimidazole), 12.22 (s, 1H, NH benzimidazole).  
<sup>13</sup>C-NMR (DMSO-d<sub>6</sub>) δ: 27.04, 52.15 (4C, piperidine), 55.57 (CH<sub>2</sub>), 62.04 (OCH<sub>3</sub>), 115.18, 123.37, 140.15 (6C, Ar), 141.80 (imidazole), 160.37 (C=N). IR (KBr) cm<sup>-1</sup>: 3254 (NH), 3036, 2987, 2890 (CH), 1620 (C=N). MS m/z: 258 (M)<sup>+</sup>. Anal. calcd for C<sub>14</sub>H<sub>18</sub>N<sub>4</sub>O: C, 65.09; H, 7.02; N, 21.69. Found: C, 65.39, H, 7.12; N, 22.03.

## Docking Methodology

### Ligand preparation

LigPrep is Schrödinger software that generates 3D structures from 2D representation. LigPrep also assigns an appropriate bond order with correct configuration and creates many numbers of structures with various tautomers, stereoisomers, ring conformations and ionization states from each structure. Subsequently optimizations of these structures are carried out by using OPLS-2005 using a default setting in the LigPrep.

### Protein preparation

The protein used in the present study is INHa (PDB.i.d - 1ZID). Maestro software package (Mastro, Schrödinger) was used to prepare the Protein structures and protein structure alignment module in Prime (Prime, Schrödinger) was used to align the protein structures. Formal charges and bond orders has been added for hydrogens and heterogroups and to all atoms. The  $\chi_2$  dihedral angle of Asn,His residues and  $\chi_3$  dihedral angle of Gln residue was inspected visually for accuracy. Hydrogen bonding was maximized if necessary, by 180°rotation and also by the manual selection of

proper His tautomer. Water molecules present in all the sites excluding the active site have been removed from the protein complex. A brief relaxation has been carried out on the structure using the option “Refinement Only” in Maestro. This procedure consisting of two steps which is optimization of hydroxyl and thiol torsions in the first step and In the second step the steric clashes in the original structures(PDB) has been alleviated using OPLS-2005 force field Impref in order to get all-atom constrained minimization (0.30 Å)

#### Grid generation and docking

Default box size setting in Glide was used for grid generation. Hydrogen bond constraints were not applied and partial atomic charge of  $< 0.25$  by 1.0 for the scaling of van der waals radii of protein atoms. Non-planar conformation was penalized for amide bonds and flips of 5- and 6-membered rings were allowed. Partial atomic charge less than 0.15 was scaled by 0.8 for van der waals radii of ligand atoms. The prepared ligands were docked against the proteins. “Extra precision” (XP) mode of Glide was used to perform all docking calculations. To locate the ligand in the active-site of the receptor, hierarchical series of filters were used by Glide. The poses that pass the initial filters test enters the final stage in which the minimization and evaluation of a grid approximation to the OPLS-AA nonbonded ligand–receptor interaction energies were involved. Final scoring was performed on the energy-minimized poses. Schrödinger’s proprietary Glide Score (G Score) scoring function was used for rescoring of the energy minimised poses. All docking computations were carried out with the Linux OS (Red Hat Enterprise WS 5.0).

#### **Cytotoxicity assay**

Cultures of Vero cell lines (African green monkey kidney cells) were procured from National Centre for Cell Sciences (NCCS), Pune, India. The cells were cultured and supplemented with amphotericin-B (5 µg/mL), penicillin (100 IU/mL), 10% heat inactivated Fetal bovine serum (FBS) and streptomycin (100 µg/mL) in Dulbecco's modified essential medium (DMEM) maintaining 37°C and 5% CO<sub>2</sub> atmosphere until confluent. Trypsinization of the cells was carried out using TPVG solution (0.2% trypsin, 0.02% EDTA, 0.05% glucose in PBS). 25 cm<sup>2</sup> flat bottles were used to grow the cultures and 96 well plates were used to perform the studies.

Viability of the cells were assessed on the basis of the conversion of MTT [(3-(4,5-dimethylthiazol-2-yl)-2,5-diphenyltetrazolium bromide] into a purple coloured product, which was recorded at 540nm.

The percentage growth calculation is as depicted below:

$$\% \text{ growth inhibition} = \frac{\text{control absorbance} - \text{test absorbance}}{\text{control absorbance}} \times 100$$

IC<sub>50</sub> ( compound concentration that reduces the number of cells by 50%) values were calculated<sup>1</sup> and selectivity index (SI) was obtained from the formula as given below:

$$SI = \frac{IC_{50}}{MIC}$$

SI value of more than 10 is considered to be nontoxic for the *in-vitro* antitubercular evaluation.<sup>2,3</sup>



## References

1. Cheng Y, Prusoff WH. Relationship between the inhibition constant (K<sub>1</sub>) and the concentration of inhibitor which causes 50 per cent inhibition (I<sub>50</sub>) of an enzymatic reaction. *Biochem Pharmacol.* 1973;22(23):3099–3108.
2. Luo X, Pires D, Aínsa JA, et al. Zanthoxylumcapense constituents with antimycobacterial activity against Mycobacterium tuberculosis in vitro and ex vivo within human macrophages. *J Ethnopharmacol.* 2013;146(1):417–422.
3. Protopopova M, Hanrahan C, Nikonenko B, et al. Identification of a new antitubercular drug candidate, SQ109, from a combinatorial library of 1,2-ethylenediamines. *J Anitimicrob Chemother.* 2005;56(5):968-974

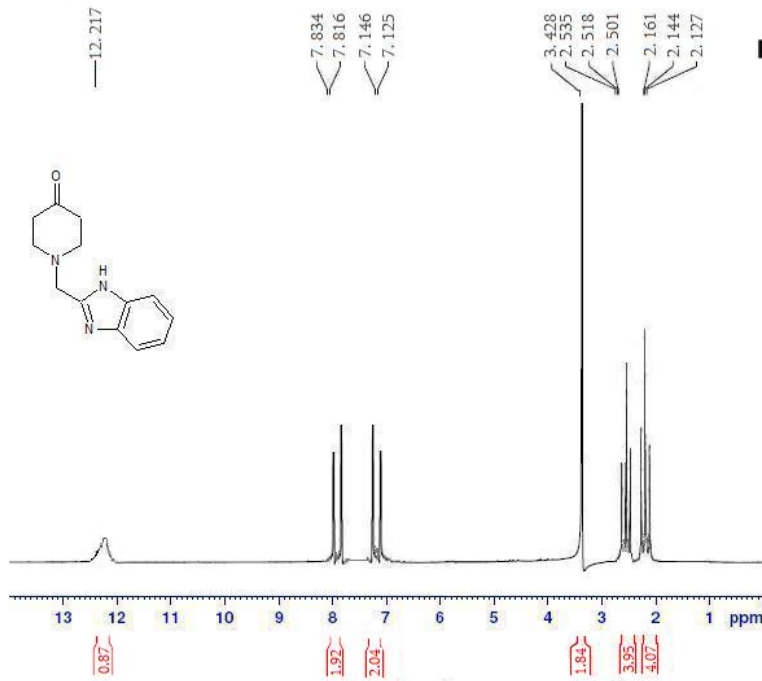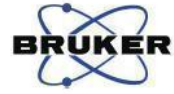

```

Current Data Parameters
NAME          SI
EXPNO         1
PROCNO        1

F2 - Acquisition Parameters
Date_         20110117
Time          13.30
INSTRUM       spect
PROBHD        5 mm F4BBO BB/
PULPROG       zg30
TD            65536
SOLVENT       DMSO
NS            16
DS            2
SWH           8012.820 Hz
FIDRES        0.122266 Hz
AQ            4.0894463 sec
RG            144.53
DW            62.400 usec
DE            6.50 usec
TE            295.3 K
C1            1.00000000 sec
TD0           1

----- CHANNEL f1 -----
SF01          400.2324716 MHz
NUC1           1H
P1            14.55 usec
PLW1          11.00000000 W

F2 - Processing parameters
SI            65536
SF            400.2300000 MHz
WDW           EM
SSB           0
LB            0.30 Hz
GB            0
PC            1.00
  
```

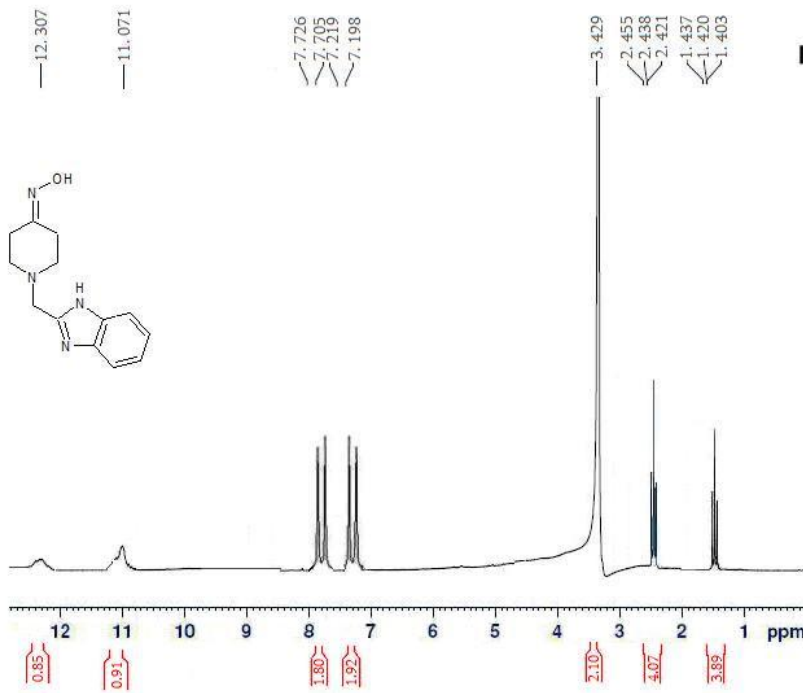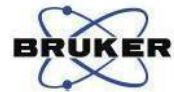

```

Current Data Parameters
NAME                S2
EXPNO               1
PROCNO              1

F2 - Acquisition Parameters
Date_               20131017
Time                14.40
INSTRUM             spect
PROBHD              5 mm PABBO BB/
PULPROG             zg30
TD                  65536
SOLVENT             DMSO
NS                  16
DS                   2
SWH                 8012.820 Hz
FIDRES              0.132266 Hz
AQ                  4.0894483 sec
RG                  144.53
DW                  62.400 usec
DE                  6.50 usec
TE                  295.1 K
D1                  1.00000000 sec
TD0                 1

----- CHANNEL f1 -----
SF01                 400.2324716 MHz
NUC1                  1H
P1                   14.55 usec
PLW1                  11.00000000 W

F2 - Processing parameters
SI                   65536
SF                   400.2300000 MHz
WDW                  EM
SSB                  0
LB                   0.30 Hz
GB                   0
PC                   1.00
  
```

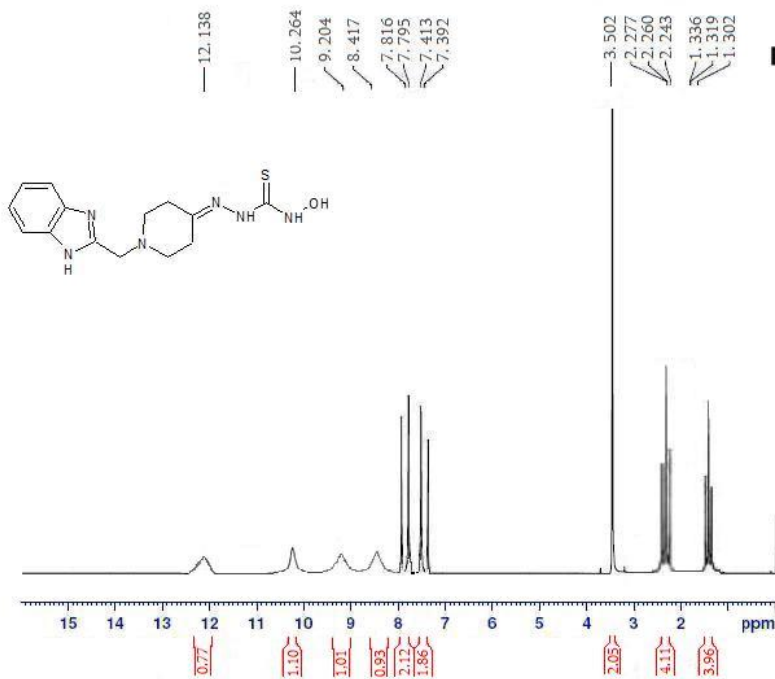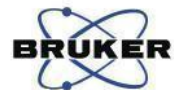

Current Data Parameters  
NAME 55  
EXPRO 1  
PROCNO 1

F2 - Acquisition Parameters  
Date\_ 20131017  
Time 11.02  
INSTRUM spect  
PROBHD 5 mm F4BBO BB/  
PULPROG zg30  
TD 65536  
SOLVENT cdc13  
NS 16  
DS 2  
SWH 8012.820 Hz  
FIDRES 0.122266 Hz  
AQ 4.0894463 sec  
RG 158.45  
DW 62.400 usec  
DE 6.50 usec  
TE 295.0 K  
CI 1.00000000 sec  
TD0 1

----- CHANNEL f1 -----  
SF01 400.2324716 MHz  
NUC1 1H  
P1 14.55 usec  
PLW1 11.00000000 W

F2 - Processing parameters  
SI 65536  
SF 400.2300084 MHz  
WDW EM  
SSB 0  
LB 0.30 Hz  
GB 0  
PC 1.00

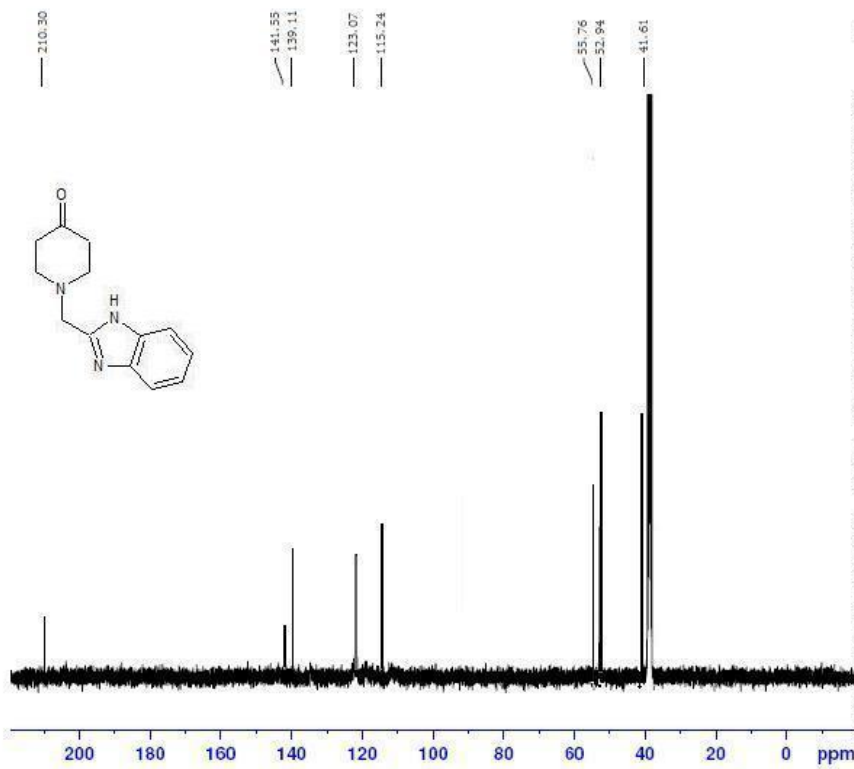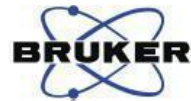

Current Data Parameters  
 NAME S1  
 EXPNO 2  
 PROCNO 1

F2 - Acquisition Parameters  
 Date\_ 20131017  
 Time 14.35  
 INSTRUM spect  
 PROBRD 5 mm PABBO BB/  
 PULPROG zgpg30  
 TD 65536  
 SOLVENT DMSO  
 NS 1024  
 DS 4  
 SWH 24039.461 Hz  
 FIDRES 0.366799 Hz  
 AQ 1.3631489 sec  
 RG 202.26  
 DM 20.900 usec  
 DE 6.50 usec  
 TE 295.9 K  
 D1 2.0000000 sec  
 D11 0.0300000 sec  
 TDO 1

==== CHANNEL f1 =====  
 SFO1 100.6479769 MHz  
 NU01 13C  
 P1 9.40 usec  
 PLW1 57.00000000 W

==== CHANNEL f2 =====  
 SFO2 400.2316009 MHz  
 NU02 1H  
 CPDPRG2 waltz16  
 FCFD2 90.00 usec  
 PLW2 11.00000000 W  
 PLW12 0.28749999 W  
 PLW13 0.23297000 W

F2 - Processing parameters  
 SI 32768  
 SF 100.6379140 MHz  
 MDW EM  
 SSB 0  
 LB 1.00 Hz  
 GB 0  
 PC 1.40

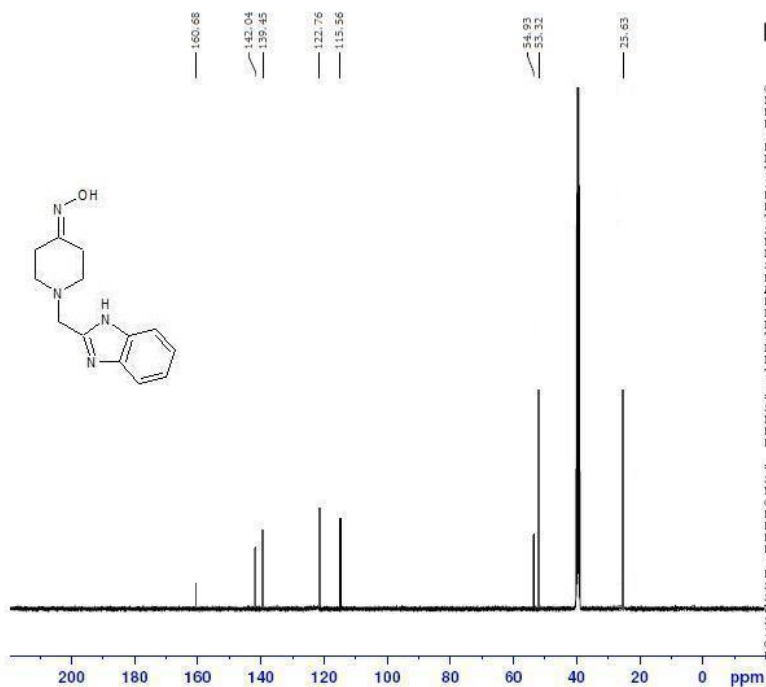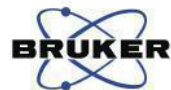

```

Current Data Parameters
NAME          _S2
EXPNO        2
PROCNO       1

F2 - Acquisition Parameters
Date_        20131017
Time         15.45
INSTRUM      spect
PROBHD       5 mm FAEBO BB/
PULPROG      zgpg30
TD           65536
SOLVENT      DMSO
NS           1024
DS           4
SWH          24939.461 Hz
FIDRES       0.366799 Hz
AQ           1.3631488 sec
RG           202.26
DW           20.800 usec
DE           6.50 usec
TE           295.9 K
D1           2.00000000 sec
D11          0.03000000 sec
TDO          1

===== CHANNEL f1 =====
SFO1         100.6479169 MHz
NUC1          13C
P1            9.40 usec
PLW1         57.00000000 W

===== CHANNEL f2 =====
SFO2         400.2316009 MHz
NUC2           1H
CPDPRG2      waltz16
PCPD2        90.00 usec
PLW2         11.00000000 W
PLW12        0.23749999 W
PLW13        0.23297000 W

F2 - Processing parameters
SI           32768
SF          100.6379140 MHz
NDM          0
SSB          0
LE           1.00 Hz
GB           0
PC           1.40
  
```

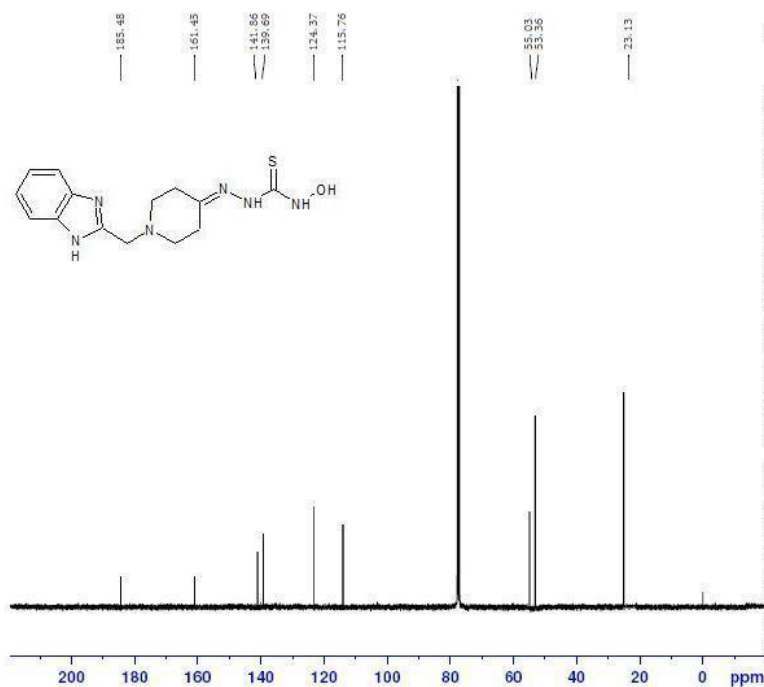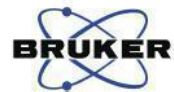

Current Data Parameters  
NAME: SS  
EXPNO: 2  
PROCNO: 1

F2 - Acquisition Parameters  
Date\_: 20131017  
Time: 12.09  
INSTRUM: spect  
PROBHD: 5 mm FAEBO BB/  
PULPROG: zgpg30  
TD: 65536  
SOLVENT: CDCl3  
NS: 1024  
DS: 4  
SWH: 24939.461 Hz  
FIDRES: 0.366799 Hz  
AQ: 1.3631488 sec  
RG: 202.26  
DW: 20.900 usec  
DE: 6.50 usec  
TE: 296.0 K  
D1: 2.0000000 sec  
D11: 0.0300000 sec  
TDO: 1

==== CHANNEL f1 =====  
SFO1: 100.6279169 MHz  
NUC1: 13C  
P1: 9.40 usec  
PLW1: 57.00000000 W

==== CHANNEL f2 =====  
SFO2: 400.2316009 MHz  
NUC2: 1H  
CPCPRG2: waltz16  
PCPD2: 90.00 usec  
PLW2: 11.00000000 W  
PLW12: 0.23749999 W  
PLW13: 0.23297000 W

F2 - Processing parameters  
SI: 32768  
SF: 100.6379140 MHz  
WDW: EM  
SSB: 0  
LE: 1.00 Hz  
GB: 0  
PC: 1.40
